# Supplementary material for: Mineral formation explains the high retention efficiency of dissolved reactive phosphorus in a residential stormwater pond
Source: Royal Society of Chemistry journal article supplement (doi:10.1039/d3va00267e), 2024-01-01
Supplement: d3va00267e1.pdf [file d3va00267e1.pdf]

**Electronic supplementary information:**

Line 110 in the latest submission (page 16 in the final published ESI):

Please replace the formula:  $I_i = P_i \times (1 - \varphi_{s,p}/\varphi_{max,p}^\beta)$  with  $I_i = P_i \times (1 - (\varphi_{s,p}/\varphi_{max,p})^\beta)$
